# Supplementary material for: Improved 18S and 28S rDNA primer sets for NGS-based parasite detection
Source: PubMed Central journal article supplement (PMC6823512; doi:10.1038/s41598-019-52422-z), 2019-10-31
Supplement: 41598_2019_52422_MOESM1_ESM.pdf [file 41598_2019_52422_MOESM1_ESM.pdf]

**Supplementary information for**  
Improved 18S and 28S rDNA primer sets for NGS-based parasite detection

Asuka Kounosu, Kazunori Murase, Akemi Yoshida, Haruhiko Maruyama and Taisei Kikuchi\*

**Table S1.** List of 18S and 28S rDNA primers evaluated in this study.

| 18S rDNA primers |                       |                                 |                     |      |                         |
|------------------|-----------------------|---------------------------------|---------------------|------|-------------------------|
| Primer ID        | Position <sup>1</sup> | Sequence                        | T <sub>m</sub> (°C) | CG%  | Reference               |
| 1391F            | 1629                  | GTA CAC ACC GCC CGT C           | 61.9                | 68.8 | Thorsten et.al (2010)   |
| EukbR            | 1774                  | TGA TCC TTC TGC AGG TTC ACC TAC | 67.6                | 50.0 | Thorsten et.al (2010)   |
| 563F             | 563                   | GCC AGC AVC YGC GGT AAY         | 68.4                | 64.8 | Hugerthet.al (2014)     |
| 574F             | 574                   | CGG TAA YTC CAG CTC YAV         | 58.6                | 53.7 | Hugerthet.al (2014)     |
| 574*F            | 574                   | CGG TAA YTC CAG CTC YV          | 58.8                | 56.9 | Hugerthet.al (2014)     |
| 616*F            | 616                   | TTA AAR VGY TCG TAG TYG         | 53.8                | 39.8 | Hugerthet.al (2014)     |
| 1132R            | 1150                  | CCG TCA ATT HCT TYA ART         | 53.9                | 35.2 | Hugerthet.al (2014)     |
| 566F             | 566                   | CAG CAG CCG CGG TAA TTC C       | 70.2                | 63.2 | Hadziavdic et.al (2014) |
| 952R             | 952                   | TTG GCA AAT GCT TTC GC          | 64.1                | 47.1 | Hadziavdic et.al (2014) |
| 1183F            | 957                   | AAT TTG ACT CAA CAC GGG         | 59.1                | 44.4 | Hadziavdic et.al (2014) |
| 1200R            | 1200                  | CCC GTG TTG AGT CAA ATT AAG C   | 64.7                | 45.5 | Hadziavdic et.al (2014) |
| 1631R            | 1246                  | TAC AAA GGG CAG GGA CGT AAT     | 64.6                | 47.6 | Hadziavdic et.al (2014) |

| 28S rDNA primers |                       |                                    |                     |      |                      |
|------------------|-----------------------|------------------------------------|---------------------|------|----------------------|
| Primer ID        | Position <sup>1</sup> | Sequence                           | T <sub>m</sub> (°C) | %GC  | Reference            |
| RM1F             | 636                   | CCG TCT TGA AAC ACG GDC YRA G      | 70.1                | 56.1 | Machida et.al (2012) |
| RM2F             | 905                   | AGG GGC GAA AGA CYA ATC GAA        | 68.5                | 50   | Machida et.al (2012) |
| RM2R             | 925                   | TTC GAT TRG TCT TTC GCC CCT        | 68.5                | 50   | Machida et.al (2012) |
| RM3F             | 1121                  | TTT TGG TAA GCA GAA CTG GYG        | 64.3                | 45.2 | Machida et.al (2012) |
| RM3R             | 1141                  | CRC CAG TTC TGC TTA CCA AAA        | 64.3                | 45.2 | Machida et.al (2012) |
| RM4F             | 1434                  | GAT CTY RGT GGY AGT AGC RAV T      | 61.7                | 48.5 | Machida et.al (2012) |
| RM4R             | 1454                  | ABT YGC TAC TRC CAC YRA GAT C      | 61.7                | 48.5 | Machida et.al (2012) |
| RM5F             | 2121                  | GGG AAT CYR ACT GTH TAA TTA AA     | 58.3                | 31.9 | Machida et.al (2012) |
| RM5R             | 2143                  | TTT AAT TAD ACA GTY RGA TTC CC     | 58.3                | 31.9 | Machida et.al (2012) |
| RM6F             | 2185                  | TGA TTT CTG CCC AGT GCT YWG AAW GT | 71                  | 44.2 | Machida et.al (2012) |
| RM6R             | 2210                  | ACW TTC WRA GCA CTG GGC AGA AAT CA | 71                  | 44.2 | Machida et.al (2012) |
| RM7F             | 2242                  | AAC GGC GGR RGT AAC TAT GAC TYT    | 67.2                | 47.9 | Machida et.al (2012) |
| RM7R             | 2265                  | ARA GTC ATA GTT ACY YCC GCC GTT    | 67.2                | 47.9 | Machida et.al (2012) |
| RM8F             | 2393                  | GGG AAA GAA GAC CCT GTT GAG        | 64.2                | 52.4 | Machida et.al (2012) |
| RM8R             | 2413                  | CTC AAC AGG GTC TTC TTT CCC        | 64.2                | 52.4 | Machida et.al (2012) |
| RM9F             | 2401                  | AAG ACC CTG TTG AGY TTG ACT CT     | 63.6                | 45.7 | Machida et.al (2012) |
| RM9R             | 2422                  | AGA GTC AAR CTC AAC AGG GTC TT     | 63.6                | 45.7 | Machida et.al (2012) |
| RM10F            | 2605                  | GGG AGT TTG RCT GGG GCG G          | 73.3                | 71.1 | Machida et.al (2012) |
| RM10R            | 2623                  | CCG CCC CAG YCA AAC TCC C          | 73.3                | 71.1 | Machida et.al (2012) |
| RM11R            | 2836                  | GCT TGG CBG CCA CAA GCC AGT TA     | 75.3                | 59.4 | Machida et.al (2012) |
| GA4F             | 26                    | ACC CGC TGA AYT TAA GCA TAT        | 61.7                | 40.5 | Auwers et.al (1993)  |
| GA5R             | 46                    | ATA TGC TTA ART TCA GCG GGT        | 61.7                | 40.5 | Auwers et.al (1993)  |
| GA6F             | 339                   | CGA TAG YVR ACA AGT A              | 46.9                | 41.7 | Auwers et.al (1993)  |
| GA7R             | 354                   | TAC TTG TYB RCT ATC G              | 46.9                | 41.7 | Auwers et.al (1993)  |
| GA8F             | 643                   | ATC TTG GTG GAC GAG T              | 53.8                | 50   | Auwers et.al (1993)  |
| GA9R             | 658                   | ACT CGT CCA CCA AGA T              | 53.8                | 50   | Auwers et.al (1993)  |
| GA10F            | 636                   | CCG TCT TGA AAC ACG GAC CAA GGA G  | 74.1                | 56   | Auwers et.al (1993)  |
| GA11R            | 660                   | CTC CTT GGT CCG TGT TTC AAG ACG G  | 74.1                | 56   | Auwers et.al (1993)  |
| GA12F            | 947                   | CCG AAG TTT CCC TCA GGA TAG C      | 57.9                | 47.4 | Auwers et.al (1993)  |

|         |      |                                    |      |      |                      |
|---------|------|------------------------------------|------|------|----------------------|
| GA13R   | 968  | GCT ATC CTG AGG GAA ACT TCG G      | 67.1 | 54.5 | Auwera et.al (1993)  |
| GA14F   | 1252 | TCC GCT AAG GAG TGT GTA ACA AC     | 64.4 | 47.8 | Auwera et.al (1993)  |
| GA15R   | 1274 | GTT GTT ACA CAC TCC TTA GCG GA     | 64.4 | 47.8 | Auwera et.al (1993)  |
| GA16F   | 1519 | GGT YAG TCG RTC CTR AG             | 54.4 | 55.9 | Auwera et.al (1993)  |
| GA17R   | 1536 | TCT YAG GAY CGA CTN AC             | 52.2 | 50   | Auwera et.al (1993)  |
| GA18F   | 1841 | CCG CAK CAG GTC TCC AA             | 65.6 | 61.8 | Auwera et.al (1993)  |
| GA19R   | 1858 | CTT GGA GAC CTG MTG CGG            | 66.4 | 63.9 | Auwera et.al (1993)  |
| GA20F   | 1917 | GTA ACT TCG GGA WAA GGA TTG GCT    | 67.1 | 45.8 | Auwera et.al (1993)  |
| GA21R   | 1940 | AGC CAA TCC TTW TCC CGA AGT TAC    | 67.1 | 45.8 | Auwera et.al (1993)  |
| GA22F   | 2185 | TGA TTT CTG CCC AGT GCT CTG AAT GT | 72.5 | 46.2 | Auwera et.al (1993)  |
| GA23R   | 2210 | ACA TTC AGA GCA CTG GGC AGA AAT CA | 72.5 | 46.2 | Auwera et.al (1993)  |
| GA24F   | 2393 | GGG AAA GAA GAC CCT GTT GAG        | 64.2 | 52.4 | Auwera et.al (1993)  |
| GA25R   | 2413 | CTC AAC AGG GTC TTC TTT CC         | 60.8 | 50   | Auwera et.al (1993)  |
| GA26F   | 2605 | GGG AGT TTG RCT GGG GCG G          | 73.3 | 71.1 | Auwera et.al (1993)  |
| GA27R   | 2623 | CCG CCC CAG YCA AAC TCC C          | 73.3 | 71.1 | Auwera et.al (1993)  |
| GA28F   | 2932 | AGG GAA CGT GAG CTG GGT TTA GAC    | 69.4 | 54.2 | Auwera et.al (1993)  |
| GA29R   | 2955 | GTC TAA ACC CAG CTC ACG TTC CCT    | 69.4 | 54.2 | Auwera et.al (1993)  |
| GA30F   | 3106 | CTG AAC GCC TCT AAG TCA GAA        | 61.6 | 47.6 | Auwera et.al (1993)  |
| GA31R   | 3126 | TTC TGA CTT AGA GGC GTT CAG        | 61.6 | 47.6 | Auwera et.al (1993)  |
| DM1F    | 26   | ACC CGC TGA ATT TAA GCA T          | 61.5 | 42.1 | Moreira et.al (2006) |
| DM2F    | 1430 | GCA GAT CTT GGT GGT AG             | 54.3 | 52.9 | Moreira et.al (2006) |
| DM3R    | 1861 | CAC CTT GGA GAC CTG CT             | 59.5 | 58.8 | Moreira et.al (2006) |
| DM4R    | 3126 | TTC TGA CTT AGA GGC GTT CAG        | 61.6 | 47.6 | Moreira et.al (2006) |
| DM568F  | 641  | TTG AAA CAC GGA CCA AGG AG         | 65.4 | 50   | Moreira et.al (2006) |
| DM1611R | 1858 | CTT GGA SAC CTG MTG CGG            | 66.8 | 63.9 | Moreira et.al (2006) |

---

<sup>1</sup> positions of primer 5' end in *S. cerevisiae* rRNA gene (NC\_001144)

**Table S2.** Primer sets targeting the 18S or 28S rRNA gene and their coverages in 13 taxonomic groups under a strict TestPrime parameter set (maximum number of mismatches of three bases and length of 0-mismatch at the 3' end of three bases)

| Taxonomy        | Representative species  | 1391F/EukBr <sup>1,2</sup> |               | 563F/1132R <sup>2</sup> |                 | 574F/952R <sup>2</sup> |               | 574*F/952R <sup>2</sup> |               | 616*F/1132R <sup>2</sup> |               | 1183F/1631R <sup>2</sup> |               |
|-----------------|-------------------------|----------------------------|---------------|-------------------------|-----------------|------------------------|---------------|-------------------------|---------------|--------------------------|---------------|--------------------------|---------------|
|                 |                         | V9                         |               | V4-V5                   |                 | V4-V5                  |               | V4-V5                   |               | V4-V5                    |               | V7-V8                    |               |
|                 |                         | 145 bp                     |               | 569 bp                  |                 | 378 bp                 |               | 378 bp                  |               | 516 bp                   |               | 449 bp                   |               |
| Nematoda        | Roundworm, Filaria      | 88.0                       | (550/625)     | 95.9                    | (2072/2160)     | 42.0                   | (908/2163)    | 93.1                    | (2014/2163)   | 96.0                     | (2080/2166)   | 87.9                     | (1822/2072)   |
| Platyhelminthes | Tapeworm, Fluke         | 81.3                       | (304/374)     | 88.3                    | (1710/1937)     | 88.7                   | (1725/945)    | 88.4                    | (1719/1945)   | 88.5                     | (1724/1948)   | 90.1                     | (1712/1900)   |
| Acanthocephala  | Spiny-headed worm       | 100.0                      | (26/26)       | 95.2                    | (60/63)         | 0.0                    | (0/63)        | 0.0                     | (0/63)        | 93.7                     | (59/63)       | 0.0                      | (0/62)        |
| Coccidia        | Coccidium               | 95.4                       | (167/175)     | 97.9                    | (656/670)       | 96.6                   | (648/671)     | 96.6                    | (648/671)     | 97.2                     | (652/971)     | 90.8                     | (444/489)     |
| Cryptosporida   | Cryptosporidium         | 97.3                       | (36/37)       | 94.5                    | (52/55)         | 96.4                   | (53/55)       | 96.4                    | (53/55)       | 92.7                     | (51/55)       | 98.1                     | (52/53)       |
| Haemosporidia   | Plasmodium              | 87.5                       | (63/72)       | 0.0                     | (0/148)         | 98.0                   | (145/148)     | 98.0                    | (145/148)     | 0.0                      | (0/149)       | 0.0                      | (0/95)        |
| Fornicata       | Giardia                 | 100.0                      | (7/7)         | 100.0                   | (21/21)         | 23.8                   | (5/21)        | 33.3                    | (7/21)        | 71.4                     | (15/21)       | 30.0                     | (6/20)        |
| Discicristata   | Trypanosoma, Leishmania | 91.9                       | (305/332)     | 92.7                    | (804/867)       | 37.2                   | (333/894)     | 37.4                    | (334/893)     | 71.4                     | (638/893)     | 85.8                     | (695/810)     |
| Parabasalia     | Trichomonas             | 77.0                       | (47/61)       | 98.0                    | (297/303)       | 0.0                    | (0/329)       | 13.2                    | (40/303)      | 19.5                     | (59/303)      | 0.0                      | (0/299)       |
| Entamoebida     | Entamoeba               | 100.0                      | (3/3)         | 100.0                   | (4/4)           | 0.0                    | (0/4)         | 0.0                     | (0/4)         | 100.0                    | (4/4)         | 0.0                      | (0/3)         |
| Longamoebia     | Acanthamoeba            | 67.9                       | (36/53)       | 86.0                    | (123/143)       | 88.4                   | (129/146)     | 89.7                    | (131/146)     | 88.0                     | (132/150)     | 88.0                     | (117/133)     |
| Fungi           |                         | 56.1                       | (3064/5458)   | 96.4                    | (14469/15009)   | 93.7                   | (14123/15071) | 94.2                    | (14192/15071) | 93.7                     | (14142/16036) | 91.7                     | (13100/14290) |
| Bacteria        |                         | 36.2                       | (32718/90407) | 89.7                    | (604569/663741) | <0.1                   | (12/575261)   | <0.1                    | (12/575261)   | <0.1                     | (12/575050)   | <0.1                     | (1/558087)    |

| DM568F/RM2R <sup>2</sup> |             | DM568F/GA13R <sup>2</sup> |             | DM568F/RM3R <sup>2</sup> |             | RM2F/RM3R <sup>2</sup> |             | RM2F/GA15R <sup>2</sup> |             | GA12F/RM4R <sup>2</sup> |             | RM3F/RM4R <sup>2</sup> |             | GA14F/RM4R <sup>2</sup> |             | GA18F/RM7R <sup>2</sup> |             |
|--------------------------|-------------|---------------------------|-------------|--------------------------|-------------|------------------------|-------------|-------------------------|-------------|-------------------------|-------------|------------------------|-------------|-------------------------|-------------|-------------------------|-------------|
| D3-D4                    |             | D3-D4                     |             | D3-D5                    |             | D4-D5                  |             | D4-D5                   |             | D4-D6                   |             | D6                     |             | D6                      |             | D8                      |             |
| 284 bp                   |             | 327 bp                    |             | 500 bp                   |             | 236 bp                 |             | 369 bp                  |             | 507 bp                  |             | 333 bp                 |             | 202 bp                  |             | 424 bp                  |             |
| 41.8                     | (228/546)   | 2.8                       | (123/4346)  | 41.8                     | (228/546)   | 94.7                   | (551/582)   | 54.8                    | (319/582)   | 92.2                    | (543/589)   | 91.5                   | (558/610)   | 90.2                    | (586/650)   | 99.8                    | (625/653)   |
| 88.2                     | (439/498)   | 84.7                      | (422/498)   | 91.4                     | (455/498)   | 99.5                   | (4951/4977) | 23.2                    | (121/521)   | 97.7                    | (512/524)   | 97.6                   | (522/535)   | 96.3                    | (524/544)   | 86.3                    | (465/539)   |
| 94.6                     | (53/56)     | 229.4                     | (39/17)     | 94.6                     | (53/56)     | 94.6                   | (53/56)     | 28.6                    | (16/56)     | 94.6                    | (53/56)     | 94.6                   | (53/56)     | 35.7                    | (20/56)     | 96.4                    | (54/56)     |
| 90.4                     | (66/73)     | 91.8                      | (67/73)     | 90.4                     | (66/73)     | 91.9                   | (68/74)     | 82.3                    | (65/79)     | 93.2                    | (69/74)     | 91.9                   | (68/74)     | 91.9                    | (68/74)     | 97.1                    | (68/70)     |
| 100.0                    | (1/1)       | 100.0                     | (1/1)       | 100.0                    | (1/1)       | 100.0                  | (1/1)       | 100.0                   | (1/1)       | 100.0                   | (1/1)       | 100.0                  | (1/1)       | 100.0                   | (1/1)       | 100.0                   | (1/1)       |
| 100.0                    | (89/89)     | 0.0                       | (0/89)      | 95.5                     | (85/89)     | 94.9                   | (93/98)     | 87.8                    | (86/98)     | 0.0                     | (0/101)     | 94.2                   | (98/104)    | 94.5                    | (103/109)   | 61.1                    | (69/113)    |
| 20.0                     | (1/5)       | 0.0                       | (0/5)       | 0.0                      | (0/5)       | 0.0                    | (0/5)       | 20.0                    | (1/5)       | 20.0                    | (1/5)       | 0.0                    | (0/5)       | 20.0                    | (1/5)       | 0.0                     | (0/5)       |
| 67.7                     | (21/31)     | 61.3                      | (19/31)     | 41.9                     | (13/31)     | 40.6                   | (13/32)     | 75.0                    | (24/32)     | 75.8                    | (25/33)     | 51.4                   | (18/35)     | 77.1                    | (27/35)     | 48.6                    | (17/35)     |
| 82.4                     | (14/17)     | 82.4                      | (14/17)     | 0.0                      | (0/17)      | 0.0                    | (0/18)      | 22.2                    | (4/18)      | 0.0                     | (0/18)      | 0.0                    | (0/20)      | 0.0                     | (0/20)      | 0.0                     | (0/20)      |
| 100.0                    | (5/5)       | 0.0                       | (0/5)       | 0.0                      | (0/5)       | 0.0                    | (0/8)       | 0.0                     | (0/8)       | 0.0                     | (0/8)       | 0.0                    | (9/9)       | 100.0                   | (9/9)       | 0.0                     | (0/9)       |
| 100.0                    | (1/1)       | 100.0                     | (1/1)       | 100.0                    | (1/1)       | 100.0                  | (1/1)       | 100.0                   | (1/1)       | 100.0                   | (1/1)       | 100.0                  | (1/1)       | 100.0                   | (1/1)       | 100.0                   | (1/1)       |
| 81.1                     | (2852/3515) | 92.9                      | (3267/3515) | 93.4                     | (3283/3515) | 93.4                   | (3340/3576) | 85.0                    | (3041/3576) | 95.5                    | (3419/3579) | 94.8                   | (3423/3612) | 95.2                    | (3401/3571) | 90.4                    | (2934/3244) |
| <0.1                     | (9/122777)  | <0.1                      | (9/122777)  | <0.1                     | (9/122777)  | <0.1                   | (9/123872)  | <0.1                    | (8/123872)  | <0.1                    | (5/124050)  | <0.1                   | (5/124626)  | <0.1                    | (6/124788)  | <0.1                    | (13/124775) |

| GA18F/RM8R <sup>2</sup> |             | GA20F/RM7R <sup>2</sup> |             | GA20F/RM8R <sup>2</sup> |             | GA20F/RM9R <sup>2</sup> |             |
|-------------------------|-------------|-------------------------|-------------|-------------------------|-------------|-------------------------|-------------|
| D8                      |             | D8                      |             | D8-D9                   |             | D8-D9                   |             |
| 572 bp                  |             | 348 bp                  |             | 406 bp                  |             | 505 bp                  |             |
| 95.8                    | (619/646)   | 97.5                    | (637/653)   | 97.8                    | (632/646)   | 10.1                    | (632/6245)  |
| 44.8                    | (47/105)    | 91.3                    | (492/539)   | 94.1                    | (498/529)   | 96.2                    | (508/528)   |
| 100.0                   | (56/56)     | 82.1                    | (46/56)     | 85.7                    | (48/56)     | 85.7                    | (48/56)     |
| 95.5                    | (64/67)     | 98.6                    | (69/70)     | 97.0                    | (65/67)     | 98.5                    | (65/66)     |
| 100.0                   | (1/1)       | 100.0                   | (1/1)       | 100.0                   | (1/1)       | 100.0                   | (1/1)       |
| 61.6                    | (69/112)    | 92.0                    | (104/113)   | 97.3                    | (109/112)   | 97.3                    | (109/112)   |
| 0.0                     | (0/5)       | 60.0                    | (3/5)       | 60.0                    | (3/5)       | 60.0                    | (3/5)       |
| 24.6                    | (16/35)     | 48.6                    | (17/35)     | 23.5                    | (16/68)     | 48.6                    | (17/35)     |
| 36.8                    | (7/19)      | 0.0                     | (0/20)      | 94.7                    | (18/19)     | 94.7                    | (18/19)     |
| 0.0                     | (0/9)       | 0.0                     | (0/9)       | 0.0                     | (0/9)       | 0.0                     | (0/9)       |
| 100.0                   | (1/1)       | 100.0                   | (1/1)       | 100.0                   | (1/1)       | 100.0                   | (1/1)       |
| 88.3                    | (2830/3205) | 95.4                    | (3059/3244) | 92.6                    | (2969/3205) | 92.0                    | (2984/3205) |
| <0.1                    | (10/124065) | <0.1                    | (13/124775) | <0.1                    | (10/124065) | <0.1                    | (10/124031) |

Primer sets were tested for matches to sequences in the SILVA database (v.132) using TestPrime with the parameters (maximum number of mismatches of three bases and length of 0-mismatch at the 3' end of three bases). TestPrime computes coverages for each taxonomic group by running *in silico* PCR on the SILVA database via sorting database sequences into “match”, “mismatch” and “nodata (sequences not covering the primer match position)”. The frequencies of “match” sequences among “match” and “mismatch” sequences are shown as percentages with the sequence numbers in parentheses.

<sup>1</sup> Only 17 bases from the 3' was used for the primer EukBr because many sequences in the SILVA database lacks the corresponding 5' region.

<sup>2</sup> Target variable regions and amplicon sizes based on the *S. cerevisiae* rRNA gene (NC\_001144) are shown below the primer names.

**Table S3.** Primer sets targeting the 18S or 28S rRNA gene and their coverages in 13 taxonomic groups under a mild TestPrime parameter set (maximum number of mismatches of five bases and length of 0-mismatch at the 3' end of three bases)

| Taxonomy        | Representative species  | 1391F/EukBr <sup>1,2</sup> |               | 563F/1132R <sup>2</sup> |                 | 574F/952R <sup>2</sup> |               | 574*F/952R <sup>2</sup> |               | 616*F/1132R <sup>2</sup> |               | 1183F/1631R <sup>2</sup> |               |
|-----------------|-------------------------|----------------------------|---------------|-------------------------|-----------------|------------------------|---------------|-------------------------|---------------|--------------------------|---------------|--------------------------|---------------|
|                 |                         | V9                         |               | V4-V5                   |                 | V4-V5                  |               | V4-V5                   |               | V4-V5                    |               | V7-V8                    |               |
|                 |                         | 145 bp                     |               | 569 bp                  |                 | 378 bp                 |               | 378 bp                  |               | 516 bp                   |               | 449 bp                   |               |
| Nematoda        | Roundworm, Filaria      | 88.3                       | (552/625)     | 95.9                    | (2072/2160)     | 42.0                   | (909/2163)    | 93.2                    | (2016/2163)   | 96.0                     | (2080/2166)   | 88.1                     | (1384/1631)   |
| Platyhelminthes | Tapeworm, Fluke         | 82.1                       | (307/374)     | 88.4                    | (1713/1937)     | 89.2                   | (1735/1945)   | 88.9                    | (1730/1946)   | 88.7                     | (1727/1947)   | 90.2                     | (1715/1901)   |
| Acanthocephala  | Spiny-headed worm       | 100.0                      | (26/26)       | 95.2                    | (60/63)         | 0.0                    | (0/63)        | 0.0                     | (0/63)        | 93.7                     | (59/63)       | 0.0                      | (0/65)        |
| Coccidia        | Coccidium               | 96.0                       | (168/175)     | 97.9                    | (656/670)       | 96.7                   | (649/671)     | 96.7                    | (649/671)     | 97.2                     | (652/671)     | 90.8                     | (444/489)     |
| Cryptosporida   | Cryptosporidium         | 97.3                       | (36/37)       | 94.5                    | (52/55)         | 96.4                   | (53/55)       | 96.4                    | (53/55)       | 92.7                     | (51/55)       | 100.0                    | (53/53)       |
| Haemosporidia   | Plasmodium              | 87.5                       | (63/72)       | 0.0                     | (0/148)         | 98.0                   | (145/148)     | 98.0                    | (145/148)     | 0.0                      | (0/149)       | 0.0                      | (0/95)        |
| Fornicata       | Giardia                 | 100.0                      | (7/7)         | 100.0                   | (21/21)         | 33.3                   | (7/21)        | 42.9                    | (9/21)        | 71.4                     | (15/21)       | 30.0                     | (6/20)        |
| Discicristata   | Trypanosoma, Leishmania | 92.2                       | (306/332)     | 93.0                    | (806/867)       | 81.3                   | (727/894)     | 84.8                    | (736/894)     | 71.7                     | (640/893)     | 86.3                     | (699/810)     |
| Parabasalia     | Trichomonas             | 77.0                       | (47/61)       | 98.0                    | (297/303)       | 0.0                    | (0/303)       | 82.8                    | (251/303)     | 19.8                     | (60/303)      | 0.0                      | (0/299)       |
| Entamoebida     | Entamoeba               | 100.0                      | (3/3)         | 100.0                   | (4/4)           | 100.0                  | (4/4)         | 100.0                   | (4/4)         | 100.0                    | (4/4)         | 0.0                      | (0/3)         |
| Longamoebia     | Acanthamoeba            | 73.6                       | (39/53)       | 87.4                    | (125/125)       | 89.0                   | (130/146)     | 90.4                    | (132/146)     | 88.0                     | (132/150)     | 89.5                     | (119/133)     |
| Fungi           |                         | 56.4                       | (3078/5458)   | 96.8                    | (14519/15006)   | 95.5                   | (14388/15071) | 95.9                    | (14460/15070) | 93.8                     | (14160/15100) | 92.0                     | (13148/14290) |
| Bacteria        |                         | 37.9                       | (34245/90407) | 90.0                    | (517733/575261) | <0.1                   | (14/575261)   | <0.1                    | (40/575261)   | <0.1                     | (258/575265)  | <0.1                     | (1/558088)    |

| DM568F/RM2R <sup>2</sup> |             | DM568F/GA13R <sup>2,3</sup> |  | DM568F/RM3R <sup>2</sup> |             | RM2F/RM3R <sup>2</sup> |             | RM2F/GA15R <sup>2</sup> |              | GA12F/RM4R <sup>2,3</sup> |  | RM3F/RM4R <sup>2</sup> |             |
|--------------------------|-------------|-----------------------------|--|--------------------------|-------------|------------------------|-------------|-------------------------|--------------|---------------------------|--|------------------------|-------------|
| D3-D4                    |             | D3-D4                       |  | D3-D5                    |             | D4-D5                  |             | D4-D5                   |              | D4-D6                     |  | D6                     |             |
| 284 bp                   |             | 327 bp                      |  | 500 bp                   |             | 236 bp                 |             | 369 bp                  |              | 507 bp                    |  | 333 bp                 |             |
| 62.1                     | (339/546)   |                             |  | 62.1                     | (339/546)   | 64.0                   | (55/86)     | 54.8                    | (319/582)    |                           |  | 92.5                   | (564/610)   |
| 88.4                     | (440/498)   |                             |  | 91.4                     | (455/498)   | 95.4                   | (497/521)   | 23.4                    | (122/521)    |                           |  | 97.8                   | (523/535)   |
| 94.6                     | (53/56)     |                             |  | 94.6                     | (53/56)     | 94.6                   | (53/56)     | 28.6                    | (16/56)      |                           |  | 100.0                  | (56/56)     |
| 90.4                     | (66/73)     |                             |  | 90.4                     | (66/73)     | 91.9                   | (68/74)     | 83.8                    | (62/74)      |                           |  | 91.9                   | (68/74)     |
| 100.0                    | (1/1)       |                             |  | 100.0                    | (1/1)       | 100.0                  | (1/1)       | 100.0                   | (1/1)        |                           |  | 100.0                  | (1/1)       |
| 100.0                    | (89/89)     |                             |  | 95.5                     | (85/89)     | 94.9                   | (93/98)     | 87.8                    | (86/98)      |                           |  | 95.2                   | (99/104)    |
| 20.0                     | (1/5)       |                             |  | 0.0                      | (0/5)       | 0.0                    | (0/5)       | 20.0                    | (1/5)        |                           |  | 20.0                   | (1/5)       |
| 67.7                     | (21/31)     |                             |  | 41.9                     | (13/31)     | 40.6                   | (13/32)     | 75.0                    | (24/32)      |                           |  | 85.7                   | (30/35)     |
| 63.0                     | (17/27)     |                             |  | 0.0                      | (0/17)      | 0.0                    | (0/18)      | 61.1                    | (11/18)      |                           |  | 5.0                    | (1/20)      |
| 100.0                    | (5/5)       |                             |  | 0.0                      | (0/5)       | 0.0                    | (0/8)       | 0.0                     | (0/8)        |                           |  | 100.0                  | (9/9)       |
| 100.0                    | (1/1)       |                             |  | 100.0                    | (1/1)       | 100.0                  | (1/1)       | 100.0                   | (1/1)        |                           |  | 100.0                  | (1/1)       |
| 82.1                     | (2886/3515) |                             |  | 94.5                     | (3322/3515) | 86.3                   | (3351/3881) | 85.2                    | (3046/3576)  |                           |  | 94.9                   | (3427/3612) |
| <0.1                     | (75/122777) |                             |  | <0.1                     | (9/122777)  | <0.1                   | (9/123545)  | <0.1                    | (336/123872) |                           |  | <0.1                   | (5/124626)  |

| GA14F/RM4R <sup>2</sup> |             | GA18F/RM7R <sup>2</sup> |             | GA18F/RM8R <sup>2</sup> |             | GA20F/RM7R <sup>2</sup> |             | GA20F/RM8R <sup>2</sup> |             | GA20F/RM9R <sup>2</sup> |             |
|-------------------------|-------------|-------------------------|-------------|-------------------------|-------------|-------------------------|-------------|-------------------------|-------------|-------------------------|-------------|
| D6                      |             | D8                      |             | D8                      |             | D8                      |             | D8-D9                   |             | D8-D9                   |             |
| 202 bp                  |             | 424 bp                  |             | 572 bp                  |             | 348 bp                  |             | 406 bp                  |             | 505 bp                  |             |
| 95.5                    | (592/620)   | 50.1                    | (327/653)   | 96.0                    | (620/646)   | 97.7                    | (638/653)   | 97.8                    | (632/646)   | 98.0                    | (632/645)   |
| 96.7                    | (526/544)   | 86.3                    | (465/539)   | 89.2                    | (472/529)   | 91.7                    | (494/539)   | 64.1                    | (50/78)     | 96.6                    | (510/528)   |
| 35.7                    | (20/56)     | 96.4                    | (54/56)     | 100.0                   | (56/56)     | 96.4                    | (54/56)     | 100.0                   | (56/56)     | 100.0                   | (561/561)   |
| 91.9                    | (68/74)     | 97.1                    | (68/70)     | 95.5                    | (64/67)     | 98.6                    | (69/70)     | 97.0                    | (65/67)     | 98.5                    | (65/66)     |
| 100.0                   | (1/1)       | 100.0                   | (1/1)       | 100.0                   | (1/1)       | 100.0                   | (1/1)       | 100.0                   | (1/1)       | 100.0                   | (1/1)       |
| 98.1                    | (104/106)   | 61.1                    | (69/113)    | 61.6                    | (69/112)    | 95.6                    | (108/113)   | 97.3                    | (109/112)   | 98.2                    | (110/112)   |
| 80.0                    | (4/5)       | 0.0                     | (0/5)       | 0.0                     | (0/5)       | 100.0                   | (5/5)       | 100.0                   | (5/5)       | 100.0                   | (5/5)       |
| 100.0                   | (35/35)     | 48.6                    | (17/35)     | 45.7                    | (16/35)     | 77.1                    | (27/35)     | 74.3                    | (26/35)     | 77.1                    | (27/35)     |
| 45.0                    | (9/20)      | 0.0                     | (0/20)      | 36.8                    | (7/19)      | 0.0                     | (0/20)      | 100.0                   | (19/19)     | 100.0                   | (19/19)     |
| 100.0                   | (9/9)       | 0.0                     | (0/9)       | 0.0                     | (0/9)       | 0.0                     | (0/9)       | 0.0                     | (0/9)       | 0.0                     | (0/9)       |
| 100.0                   | (1/1)       | 100.0                   | (1/1)       | 100.0                   | (1/1)       | 100.0                   | (1/1)       | 100.0                   | (1/1)       | 100.0                   | (1/1)       |
| 95.8                    | (3480/3631) | 90.7                    | (2943/3244) | 88.9                    | (2849/3205) | 95.4                    | (3096/3244) | 94.0                    | (3096/3292) | 94.4                    | (3027/3205) |
| <0.1                    | (7/124788)  | <0.1                    | (28/124775) | <0.1                    | (10/124065) | <0.1                    | (49/124775) | <0.1                    | (10/124065) | <0.1                    | (27/124041) |

Primer sets were tested for matches to sequences in the SILVA database (v.132) using TestPrime with the parameters (maximum number of mismatches of five bases and length of 0-mismatch at the 3' end of three bases). TestPrime computes coverages for each taxonomic group by running *in silico* PCR on the SILVA database via sorting database sequences into “match”, “mismatch” and “nodata (sequences not covering the primer match position)”. The frequencies of “match” sequences among “match” and “mismatch” sequences are shown as percentages with the sequence numbers in parentheses.

<sup>1</sup> Only 17 bases from the 3' was used for the primer EukBr because many sequences in the SILVA database lacks the corresponding 5' region.

<sup>2</sup> Target variable regions and amplicon sizes based on the *S. cerevisiae* rRNA gene (NC\_001144) are shown below the primer names.

<sup>3</sup> These primer sets could not be evaluated by the TestPrime.

**Table S4.** Summary of numbers of sequence reads and detected OTUs.

|     |                           | EMP<br>(1391F/EukBR) | 563F/1132R   | 616F/1132R    | 1183F/1631R   | DM568F/RM2R   | RM2F/RM3R     | GA12F/RM4R    | GA20F/RM9R    |
|-----|---------------------------|----------------------|--------------|---------------|---------------|---------------|---------------|---------------|---------------|
| WR4 | Num of Reads <sup>1</sup> | 13025 (17667)        | 4285 (25474) | 15753 (16307) | 18996 (18996) | 48866 (48866) | 27792 (27792) | 12072 (12072) | 13899 (13899) |
|     | Num of OTUs <sup>1</sup>  | 117 (259)            | 129 (1516)   | 414 (500)     | 289 (289)     | 385 (385)     | 155 (155)     | 187 (187)     | 250 (250)     |
| WR5 | Num of Reads <sup>1</sup> | 21053 (23017)        | 9574 (27739) | 19317 (19375) | 19293 (19293) | 43225 (43225) | 27554 (27554) | 10823 (10823) | 17161 (17163) |
|     | Num of OTUs <sup>1</sup>  | 82 (166)             | 161 (1264)   | 354 (375)     | 168 (168)     | 169 (169)     | 56 (56)       | 141 (141)     | 179 (181)     |
| WR6 | Num of Reads <sup>1</sup> | 17304 (24203)        | 7750 (29832) | 20698 (20992) | 23037 (23037) | 44286 (44286) | 31753 (31753) | 12996 (12996) | 22461 (22463) |
|     | Num of OTUs <sup>1</sup>  | 103 (217)            | 258 (1235)   | 493 (528)     | 322 (322)     | 198 (198)     | 148 (148)     | 227 (227)     | 299 (301)     |
| WR7 | Num of Reads <sup>1</sup> | 13734 (24795)        | 3846 (31222) | 16914 (17969) | 17365 (17365) | 42145 (42145) | 30170 (30170) | 12128 (12128) | 14914 (14914) |
|     | Num of OTUs <sup>1</sup>  | 136 (313)            | 151 (1524)   | 394 (469)     | 358 (358)     | 232 (232)     | 131 (131)     | 204 (204)     | 218 (218)     |
| WR8 | Num of Reads <sup>1</sup> | 15104 (20068)        | 6480 (31761) | 19130 (19437) | 22575 (22575) | 52606 (52606) | 29309 (29309) | 15091 (15091) | 16324 (16326) |
|     | Num of OTUs <sup>1</sup>  | 101 (229)            | 94 (1243)    | 319 (358)     | 174 (174)     | 177 (177)     | 62 (62)       | 158 (158)     | 151 (153)     |
| ZR4 | Num of Reads <sup>1</sup> | 9963 (21356)         | 2820 (30190) | 13878 (14949) | 20592 (20592) | 33541 (33541) | 25924 (25924) | 9196 (9196)   | 17680 (17684) |
|     | Num of OTUs <sup>1</sup>  | 121 (201)            | 102 (1647)   | 209 (303)     | 339 (339)     | 108 (108)     | 44 (44)       | 256 (256)     | 183 (187)     |
| MB1 | Num of Reads <sup>1</sup> | 3465 (12234)         | 499 (28553)  | 5468 (6146)   | 16258 (16259) | 37951 (38009) | 35874 (35879) | 5095 (5095)   | 19028 (19476) |
|     | Num of OTUs <sup>1</sup>  | 224 (376)            | 68 (1645)    | 281 (363)     | 908 (909)     | 407 (413)     | 253 (254)     | 156 (156)     | 467 (486)     |

<sup>1</sup> Eukaryotic read and OTU numbers are shown. Total number of reads/OTUs are shown in parenthesis.



In a separate excel file.

**Table S5.** Taxonomic classification of eukaryotic reads of all faecal samples and primer sets at the SILVA Level 1 (Dataset 1)

**Table S6.** Taxonomic classification of eukaryotic reads of all faecal samples and primer sets at the SILVA Level 4 (Dataset 1)

**Table S7.** Taxonomic classification of eukaryotic reads of all faecal samples and primer sets at the SILVA Level 7 (Dataset 1)

**Table S8.** Taxonomic classification of eukaryotic reads of all faecal samples and primer sets at the SILVA Level 10 (Dataset 1)

**Table S9.** Taxonomic classification of eukaryotic reads of all faecal samples and primer sets at the SILVA Level 1 (Dataset 2)

**Table S10.** Taxonomic classification of eukaryotic reads of all faecal samples and primer sets at the SILVA Level 4 (Dataset 2)

**Table S11.** Taxonomic classification of eukaryotic reads of all faecal samples and primer sets at the SILVA Level 7 (Dataset 2)

**Table S12.** Taxonomic classification of eukaryotic reads of all faecal samples and primer sets at the SILVA Level 10 (Dataset 2)

**Table S14.** Evaluation of the taxon-specific primer sets and their coverages in 14 taxonomic groups by TestPrime (maximum number of mismatches of four bases and length of 0-mismatch at the 3' end of three bases)

**Table S13.** Evaluation of A) 18S and B) 28S primer sets whose amplicon size is out of the target range for matches to the sequences of 13 taxonomic groups.

**A)**

| Taxonomy        | Representative species  | 566F/1200R <sup>1</sup> |               |
|-----------------|-------------------------|-------------------------|---------------|
|                 |                         | V4-V5<br>634 bp         |               |
| Nematoda        | Roundworm, Filaria      | 94.6                    | (2043/2159)   |
| Platyhelminthes | Tapeworm, Fluke         | 86.4                    | (1672/1953)   |
| Acanthocephala  | Spiny-headed worm       | 85.7                    | (54/63)       |
| Coccidia        | Coccidium               | 77.4                    | (65/84)       |
| Cryptosporida   | Cryptosporidium         | 94.5                    | (52/55)       |
| Haemosporidia   | Plasmodium              | 95.9                    | (142/148)     |
| Fornicata       | Giardia                 | 76.2                    | (16/21)       |
| Discicristata   | Trypanosoma, Leishmania | 45.3                    | (384/847)     |
| Parabasalia     | Trichomonas             | 82.2                    | (249/303)     |
| Entamoebida     | Entamoeba               | 100.0                   | (4/4)         |
| Longamoebia     | Acanthamoeba            | 89.8                    | (115/128)     |
| Fungi           |                         | 95.2                    | (14289/15003) |
| Bacteria        |                         | <0.1                    | (12/575261)   |
| Euteleostomi    | Mammal                  | 72.7                    | (784/1079)    |

**B)**

| Taxonomy        | Representative species  | RM7F/RM9R <sup>2</sup> |             |
|-----------------|-------------------------|------------------------|-------------|
|                 |                         | D9<br>180 bp           |             |
| Nematoda        | Roundworm, Filaria      | 96.7                   | (624/645)   |
| Platyhelminthes | Tapeworm, Fluke         | 93.2                   | (492/528)   |
| Acanthocephala  | Spiny-headed worm       | 94.6                   | (53/56)     |
| Coccidia        | Coccidium               | 77.3                   | (51/66)     |
| Cryptosporida   | Cryptosporidium         | 100.0                  | (1/1)       |
| Haemosporidia   | Plasmodium              | 92.0                   | (103/112)   |
| Fornicata       | Giardia                 | 100.0                  | (5/5)       |
| Discicristata   | Trypanosoma, Leishmania | 100.0                  | (35/35)     |
| Parabasalia     | Trichomonas             | 94.7                   | (18/19)     |
| Entamoebida     | Entamoeba               | 100.0                  | (9/9)       |
| Longamoebia     | Acanthamoeba            | 100.0                  | (1/1)       |
| Fungi           |                         | 91.8                   | (2946/3209) |
| Bacteria        |                         | <0.1                   | (11/124041) |
| Euteleostomi    | Mammal                  | 83.3                   | (334/401)   |

Primer sets were tested for matches to sequences in the SILVA database (v.132) using TestPrime under parameters (maximum number of mismatches of 4 bases, and length of 0-mismatch at 3' end of 3 bases). TestPrime computes coverages for each taxonomic group by running an in silico PCR on the SILVA database by sorting database sequences into “match”, “mismatch” and “nodata (sequences not covering the primer match position)”, The frequencies of “match” sequences out of “match” or “mismatch” sequences are shown in percentages.

<sup>1</sup> Target variable regions and amplicon sizes based on *S. cerevisiae* rRNA gene (NC\_001144) were shown below primer names.

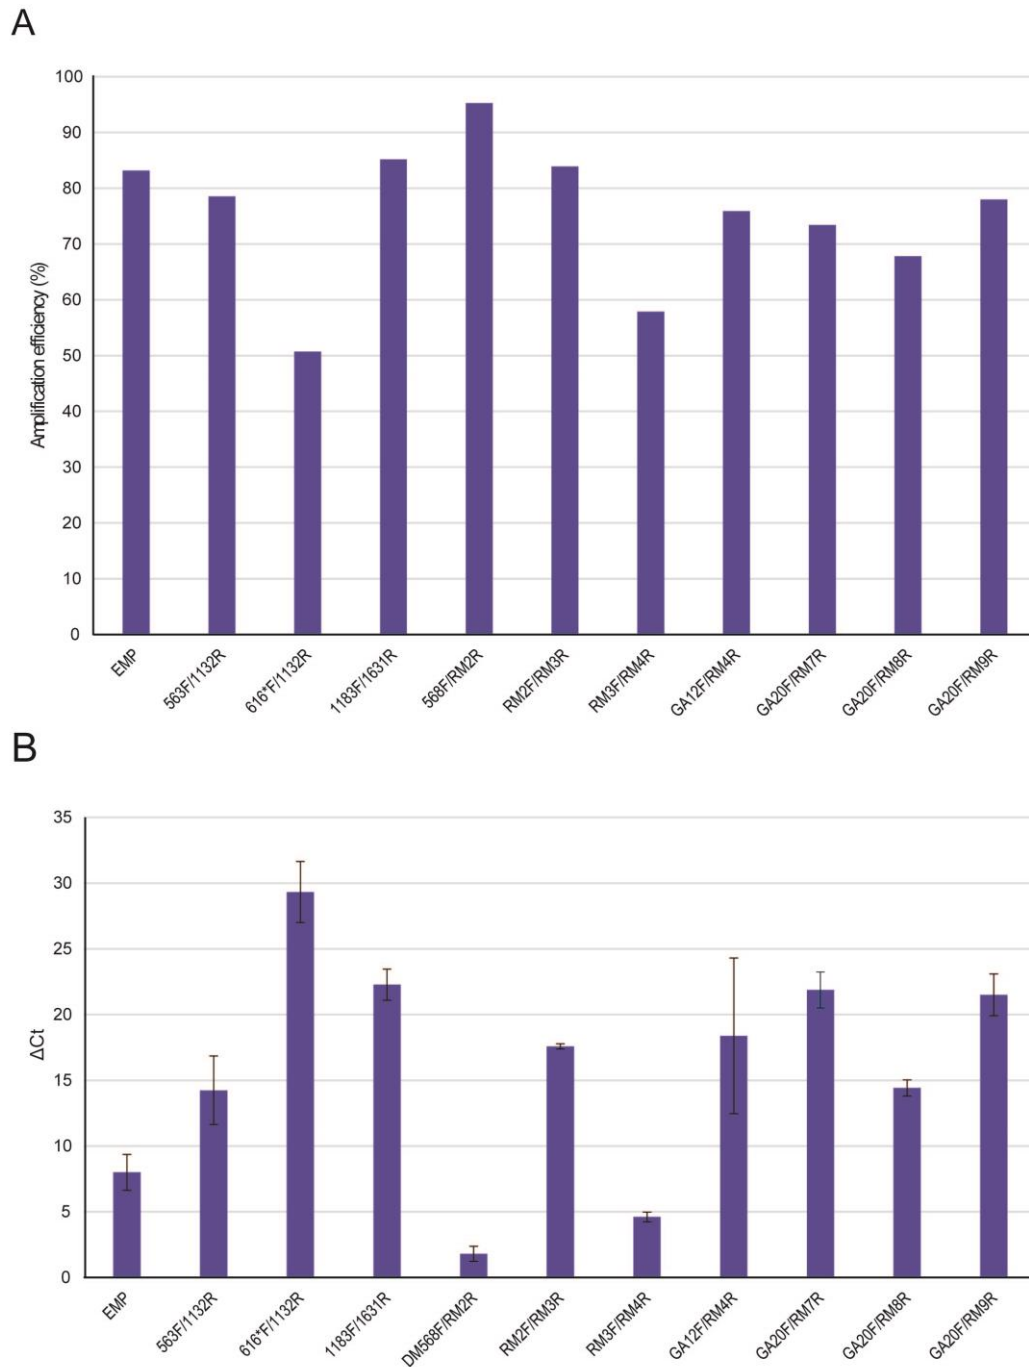

**Fig. S1.** PCR amplification efficiency and bacterial amplification of 18S and 28S primer sets. (A) PCR efficiencies were calculated for each primer set targeting 18S or 28S rRNA genes using *C. elegans* genomic DNA as templates. (B) Differences of Ct (Cycle threshold) values between the two templates (Ct with 0.1 ng bacterial DNA minus Ct with 0.1 ng *C. elegans* genomic DNA) were shown for each primer set. Error bars represent S.E. from triplicate data.
